# Supplementary material for: Efficient degradation of formaldehyde based on DFT-screened metal-doped C3N6 monolayer photocatalysts: performance evaluation and mechanistic insights
Source: Royal Society of Chemistry journal article supplement (doi:10.1039/d3cp03160h), 2023-01-01
Supplement: d3cp03160h1.pdf [file d3cp03160h1.pdf]

Supporting material for

## **Efficient Degradation of Formaldehyde Based on DFT-Screened Metal-Doped $C_3N_6$ Monolayer Photocatalysts: Performance Evaluation and Mechanistic Insights**

Mengshan Chen<sup>a, †</sup>, Haijian Wang<sup>a, †</sup>, Jinhu Wang<sup>a</sup>, Mingyuzhi Sun<sup>a</sup>, Yaxuan Hu<sup>a</sup>, Xue Zhao<sup>b, \*</sup>, Yingtang Zhou<sup>a, \*</sup>

<sup>a</sup> Zhejiang Key Laboratory of Petrochemical Environmental Pollution Control, National Engineering Research Center for Marine Aquaculture, Marine Science and Technology College, Zhejiang Ocean University, Zhoushan, Zhejiang Province 316004, China.

<sup>b</sup> Faculty of Chemistry and Chemical Engineering, Yunnan Normal University, Kunming 650000, China

+ show that the authors contributed equally.

\*Corresponding Authors: [zhaoxue@ynnu.edu.cn](mailto:zhaoxue@ynnu.edu.cn) (X. Zhao), [zhouyingtang@zjou.edu.cn](mailto:zhouyingtang@zjou.edu.cn) (Y. Zhou)

## Calculation method details

To ensure accurate screening for high-performance transition metals, we calculated the binding energy ( $E_b$ ) of TM embedded in  $C_3N_6$ . This approach allowed us to gain insights into the stability and interaction between the transition metals and  $C_3N_6$ , enabling us to identify potential candidates for high-performance applications.

$$E_b = E_{M-C_3N_6} - E_M - E_{C_3N_6}$$

$$E_M = E_{M-bulk} / n$$

where  $E_M$ ,  $E_{C_3N_6}$ , and  $E_{M-C_3N_6}$  are the energy of the bulk metal averaged over each atom, and  $C_3N_6$  and the energy of  $C_3N_6$  are immobilized by a single metal atom, respectively.  $E_{M-bulk}$  and  $N$  are the energy of the bulk metal and the number of metal atoms in the bulk metal unit, respectively. To prevent the TM from clumping, we also considered the cohesive energy of the TM itself. We calculated the difference between the binding energy and the cohesive energy of the system ( $\Delta E_f$ ) using the following equation:

$$\Delta E_f = E_b - E_c$$

$$E_c = E_M - E_s$$

where  $E_b$  is the binding energy of the TM embedded in  $C_3N_6$ ,  $E_c$  is the cohesion energy of the TM,  $E_M$  is the energy of the bulk metal averaged over each atom, and  $E_s$  is the energy of a single atom. The energy of adsorption ( $E_{ads}$ ) of HCHO is calculated as follows:

$$E_{ads} = E_{HCHO-M-C_3N_6} - E_{M-C_3N_6} - E_{HCHO}$$

Where  $E_{HCHO-M-C_3N_6}$  is the total energy of a surface interacting with adsorbate,  $E_{HCHO}$ , and  $E_{M-C_3N_6}$  are the energies of the isolated adsorbate and clean surface, respectively.

To analyze the different reaction paths, the Gibbs free energy was calculated for every gas and adsorbed material based on this expression at 298.15k, 1 atom [37].

$$G = E_{DFT} + E_{ZPE} - TS$$

Where  $E_{DFT}$  shows the free energy calculated with VASP,  $E_{ZPE}$  is the zero-point energy and  $TS$  is the entropic contribution. The  $E_{ZPE}$  and  $TS$  are calculated from temperature, pressure, and vibration energy using the standard ideal gas method.

We use the Gaussian 16 package to calculate the topological analysis of the electronic delocalization

function of HCHO using the B3LYP method of density-functional theory calculations under the 6-31+G\*\* group. The analyses were performed using Multiwfn1 and VMD software.

**Table S1** Formaldehyde at TM-C<sub>3</sub>N<sub>6</sub> site 1, energy at site 2, and energy at TM-C<sub>3</sub>N<sub>6</sub>

| <b>System</b> | <b>Energy-site 1-(HCHO)</b> | <b>Energy-site 2-(HCHO)</b> | <b>Energy-slab-site 1</b> |
|---------------|-----------------------------|-----------------------------|---------------------------|
| <b>Sc</b>     | -618.11                     | -617.98                     | -592.36                   |
| <b>Ti</b>     | -618.15                     | -618.09                     | -592.37                   |
| <b>V</b>      | -618.65                     | -618.54                     | -593.12                   |
| <b>Cr</b>     | -617.99                     | -617.65                     | -593.18                   |
| <b>Mn</b>     | -616.52                     | -616.43                     | -592.29                   |
| <b>Fe</b>     | -616.16                     | -616.15                     | -590.54                   |
| <b>Co</b>     | -615.19                     | -615.23                     | -589.69                   |
| <b>Ni</b>     | -613.95                     | -613.93                     | -588.73                   |
| <b>Cu</b>     | -612.36                     | -612.36                     | -587.07                   |
| <b>Zn</b>     | -610.61                     | -610.60                     | -585.09                   |
| <b>Y</b>      | -618.54                     | -618.53                     | -593.26                   |
| <b>Zr</b>     | -619.15                     | -619.15                     | -593.29                   |
| <b>Nb</b>     | -618.66                     | -618.66                     | -593.32                   |
| <b>Mo</b>     | -617.95                     | -617.92                     | -592.22                   |
| <b>Tc</b>     | -617.24                     | -616.98                     | -591.60                   |
| <b>Ru</b>     | -616.34                     | -616.32                     | -591.01                   |
| <b>Rh</b>     | -615.09                     | -615.22                     | -589.97                   |
| <b>Pd</b>     | -613.31                     | -613.28                     | -588.00                   |
| <b>Ag</b>     | -610.96                     | -610.93                     | -586.12                   |
| <b>Cd</b>     | -608.62                     | -608.71                     | -584.56                   |
| <b>Hf</b>     | -620.41                     | -620.23                     | -594.55                   |
| <b>Ta</b>     | -619.92                     | -619.29                     | -593.94                   |
| <b>W</b>      | -619.28                     | -619.29                     | -593.28                   |
| <b>Re</b>     | -618.05                     | -617.97                     | -592.65                   |
| <b>Os</b>     | -617.42                     | -617.12                     | -591.70                   |
| <b>Ir</b>     | -615.92                     | -616.14                     | -590.39                   |
| <b>Pt</b>     | -613.92                     | -613.84                     | -588.29                   |

Au

-608.89

-608.91

-585.66

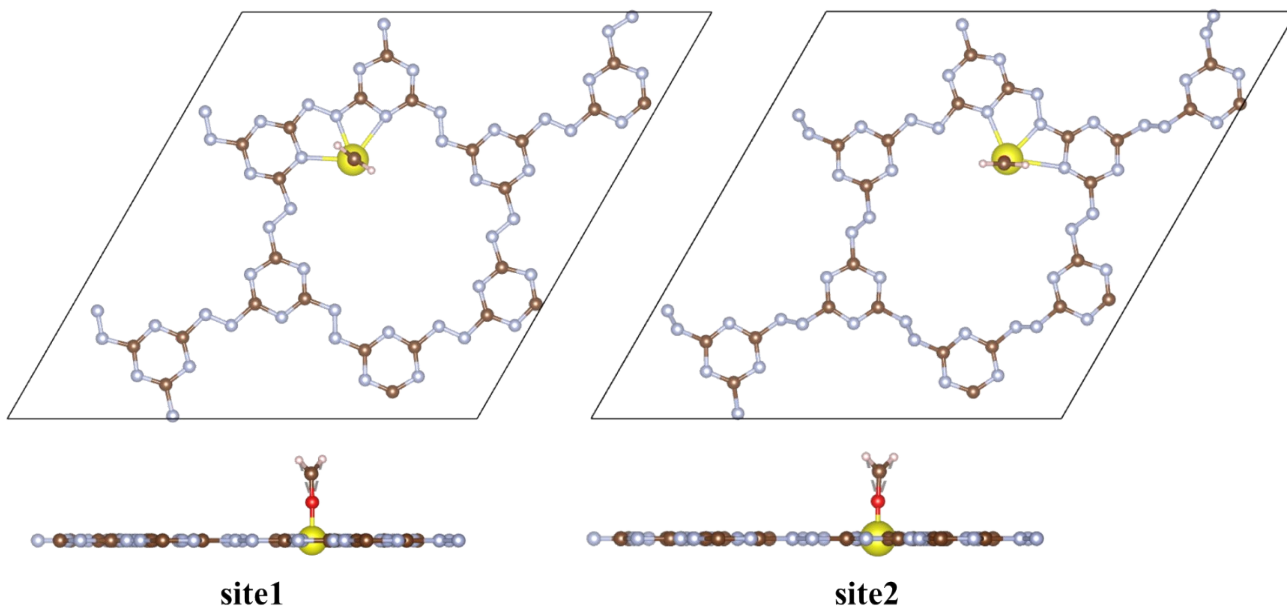

FigureS1. Adsorption model of site1 and site2 for Metal doping in C<sub>3</sub>N<sub>6</sub>

**Table S1.** Adsorption energies of O<sub>2</sub>, H<sub>2</sub>O, HCHO@O<sub>2</sub>, CO<sub>2</sub>, HCHO@H<sub>2</sub>O, HCHO in C<sub>3</sub>N<sub>6</sub>, Zr-C<sub>3</sub>N<sub>6</sub> and Hf-C<sub>3</sub>N<sub>6</sub>.

| Adsorption structure                                                | Total   | slab    | gas    | HCHO   | Eads  |
|---------------------------------------------------------------------|---------|---------|--------|--------|-------|
| S-C <sub>3</sub> N <sub>6</sub> -N <sub>2</sub> -O <sub>2</sub> -V  | -592.37 | -583.58 | -9.86  | 0.00   | 1.06  |
| S-C <sub>3</sub> N <sub>6</sub> -N <sub>2</sub> -O <sub>2</sub> -P  | -592.23 | -583.58 | -9.86  | 0.00   | 1.20  |
| S-C <sub>3</sub> N <sub>6</sub> -N <sub>2</sub> -H <sub>2</sub> O-V | -597.65 | -583.58 | -14.22 | 0.00   | 0.15  |
| S-C <sub>3</sub> N <sub>6</sub> -N <sub>2</sub> -H <sub>2</sub> O-P | -597.65 | -583.58 | -14.22 | 0.00   | 0.15  |
| S-C <sub>3</sub> N <sub>6</sub> -Hf-CO <sub>2</sub>                 | -617.64 | -594.55 | -22.96 | 0.00   | -0.13 |
| S-C <sub>3</sub> N <sub>6</sub> -Hf-H <sub>2</sub> O-P              | -609.84 | -594.55 | -14.22 | 0.00   | -1.07 |
| S-C <sub>3</sub> N <sub>6</sub> -Hf-H <sub>2</sub> O-V              | -609.87 | -594.55 | -14.22 | 0.00   | -1.10 |
| S-C <sub>3</sub> N <sub>6</sub> -Hf-HCHO@H <sub>2</sub> O           | -635.25 | -594.55 | -14.22 | -22.14 | -4.34 |
| S-C <sub>3</sub> N <sub>6</sub> -Hf-HCHO@O <sub>2</sub>             | -632.92 | -594.55 | -9.86  | -22.14 | -6.37 |
| S-C <sub>3</sub> N <sub>6</sub> -Hf-O <sub>2</sub> -P               | -608.53 | -594.55 | -9.86  | 0.00   | -4.13 |
| S-C <sub>3</sub> N <sub>6</sub> -Hf-O <sub>2</sub> -V               | -606.89 | -594.55 | -9.86  | 0.00   | -2.49 |
| S-C <sub>3</sub> N <sub>6</sub> -Hf-HCHO                            | -620.41 | -594.55 | 0.00   | -22.14 | -3.72 |
| S-C <sub>3</sub> N <sub>6</sub> -Zr-CO <sub>2</sub>                 | -616.63 | -593.29 | -22.96 | 0.00   | -0.39 |
| S-C <sub>3</sub> N <sub>6</sub> -Zr-H <sub>2</sub> O-P              | -608.89 | -593.29 | -14.22 | 0.00   | -1.39 |
| S-C <sub>3</sub> N <sub>6</sub> -Zr-H <sub>2</sub> O-V              | -608.91 | -593.29 | -14.22 | 0.00   | -1.40 |
| S-C <sub>3</sub> N <sub>6</sub> -Zr-HCHO@O <sub>2</sub>             | -631.07 | -593.29 | -9.86  | -22.14 | -5.79 |
| S-C <sub>3</sub> N <sub>6</sub> -Zr-HCHO@H <sub>2</sub> O           | -634.06 | -593.29 | -14.22 | -22.14 | -4.42 |
| S-C <sub>3</sub> N <sub>6</sub> -Zr-O <sub>2</sub> -V               | -605.83 | -593.29 | -9.86  | 0.00   | -2.69 |
| S-C <sub>3</sub> N <sub>6</sub> -Zr-O <sub>2</sub> -P               | -607.32 | -593.29 | -9.86  | 0.00   | -4.17 |
| S-C <sub>3</sub> N <sub>6</sub> -Zr-HCHO                            | -619.15 | -593.29 | 0.00   | -22.14 | -3.72 |

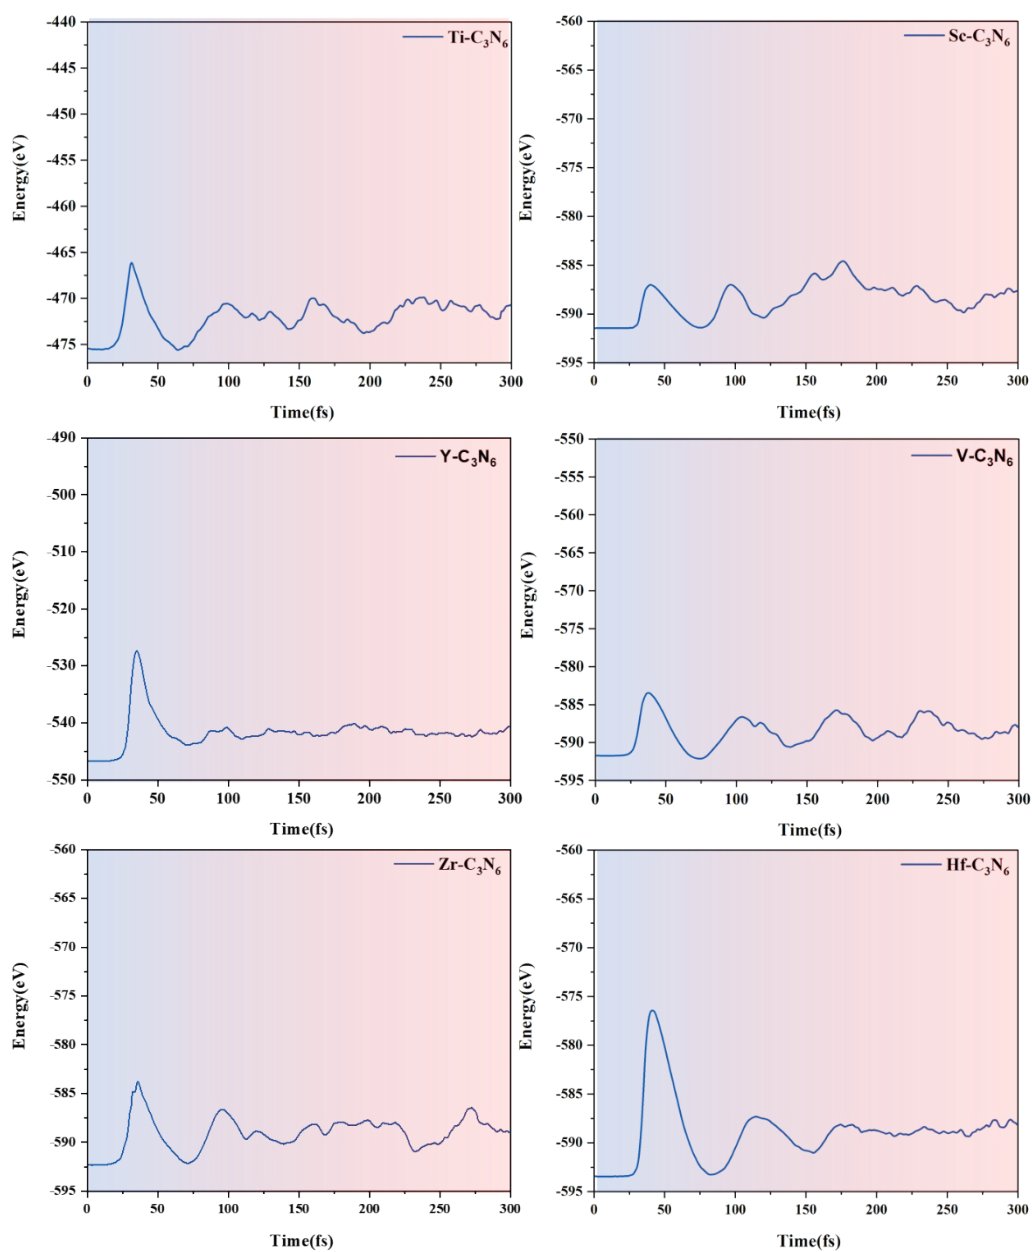

**Fig S2 AIMD diagram of the TM-C<sub>3</sub>N<sub>6</sub>(Ti,Sc,Y,V,Zr,Hf)**

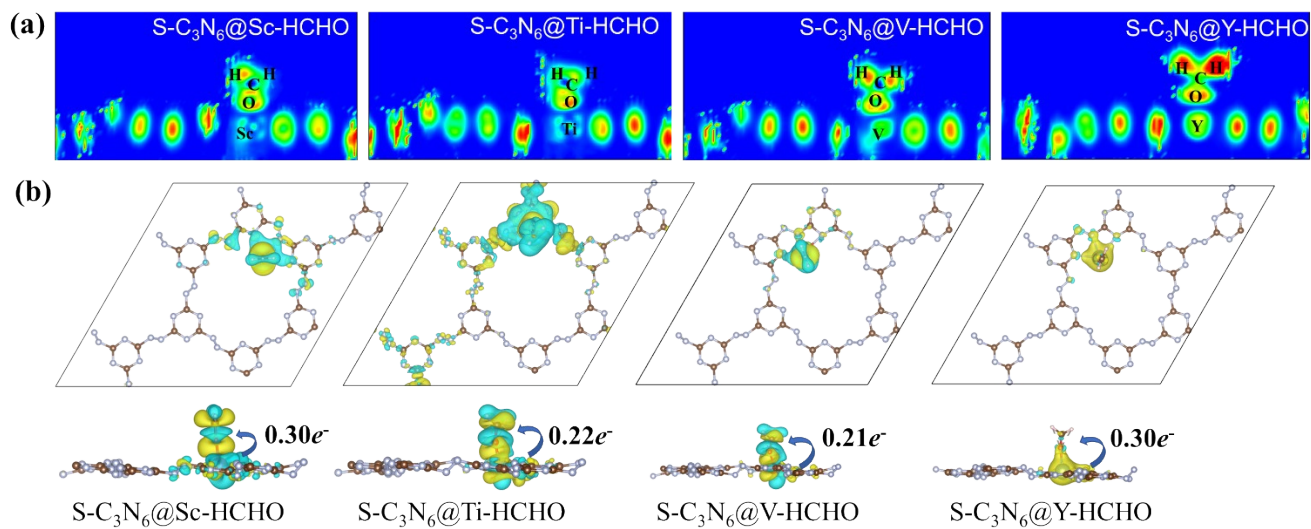

**Figure S3.** (a) ELF of HCHO adsorbed on TM-C<sub>3</sub>N<sub>6</sub> (Sc, Ti, V, Y), respectively; (b) Differential charge density and charge transfer for HCHO adsorption by Sc, Ti, V, Y-embedded C<sub>3</sub>N<sub>6</sub>, respectively.

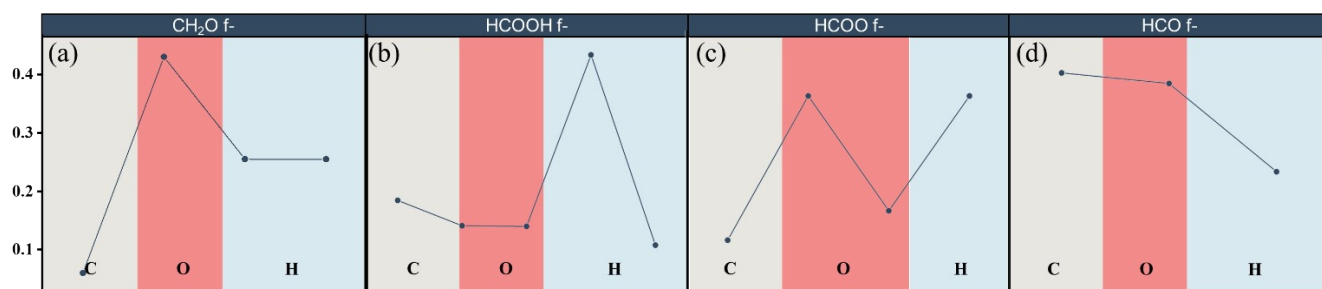

**Figure S4.** (a-d) Fukui functions ( $f^-$ ) of intermediates from HCHO degradation into  $\text{CO}_2$ .



## Gibbs free energy calculation :

**\*OH is involved in the degradation of formaldehyde:**

$$G = H - TS = U + PV - TS = E_{\text{DFT}} + E_{\text{ZPE}} + nRT - TS \quad (n=1)$$

$$\Delta G [\text{OH}^*] = G [\text{HCHO}] + G [\text{OH}^*] + G [\text{H}^+ + e^-] - (G [*] + G [\text{HCHO}] + G [\text{H}_2\text{O}])$$

$$\Delta G [\text{HCOOH}^*] = G [\text{HCOOH}^*] + 2G [\text{H}^+ + e^-] - (G [*] + G [\text{HCHO}] + G [\text{H}_2\text{O}])$$

$$\Delta G [\text{HCOO}^*] = G [\text{HCOO}^*] + 3G [\text{H}^+ + e^-] - (G [*] + G [\text{HCHO}] + G [\text{H}_2\text{O}])$$

$$\Delta G [\text{CO}_2^*] = G [\text{CO}_2^*] + 4G [\text{H}^+ + e^-] - (G [*] + G [\text{HCHO}] + G [\text{H}_2\text{O}])$$

$$G [\text{H}^+ + e^-] = 1/2G [\text{H}_2] - eU$$

**\*O is involved in the degradation of formaldehyde:**

$$\Delta G [\text{O}^*] = G [\text{HCHO}] + G [\text{O}^*] - (G [*] + G [\text{HCHO}] + G [\text{O}_2])$$

$$\Delta G [\text{HCHOO}^*] = G [\text{HCHOO}^*] + G [\text{O}] - (G [*] + G [\text{HCHO}] + G [\text{O}_2])$$

$$\Delta G [\text{HCOO}^*] = G [\text{HCOO}^*] + G [\text{OH}] - (G [*] + G [\text{HCHO}] + G [\text{O}_2])$$

$$\Delta G [\text{CO}_2^*] = G [\text{CO}_2^*] + G [\text{H}_2\text{O}] - (G [*] + G [\text{HCHO}] + G [\text{O}_2])$$

$$G [\text{O}] = 1/2G [\text{O}_2] - eU$$

**Direct degradation of formaldehyde:**

$$\Delta G [\text{CHO}^*] = G [\text{CHO}^*] + G [\text{H}] - (G [*] + G [\text{HCHO}])$$

$$\Delta G [\text{CO}^*] = G [\text{CO}^*] + G [\text{H}_2\text{O}] - (G [*] + G [\text{HCHO}])$$
